# Supplementary material
Source: publisher figshare collection journal article supplement (https://tandf.figshare.com/ndownloader/files/23614370)

# checkCIF/PLATON report

You have not supplied any structure factors. As a result the full set of tests cannot be run.

THIS REPORT IS FOR GUIDANCE ONLY. IF USED AS PART OF A REVIEW PROCEDURE FOR PUBLICATION, IT SHOULD NOT REPLACE THE EXPERTISE OF AN EXPERIENCED CRYSTALLOGRAPHIC REFEREE.

No syntax errors found.      CIF dictionary      Interpreting this report

## Datablock: w276

---

|                 |                      |                                |
|-----------------|----------------------|--------------------------------|
| Bond precision: | C-C = 0.0126 Å       | Wavelength=0.71073             |
| Cell:           | a=12.4772(9)         | b=9.7307(7)      c=21.9059(17) |
|                 | alpha=90             | beta=93.201(2)      gamma=90   |
| Temperature:    | 273 K                |                                |
|                 | Calculated           | Reported                       |
| Volume          | 2655.5(3)            | 2655.5(3)                      |
| Space group     | P 21/c               | P 1 21/c 1                     |
| Hall group      | -P 2ybc              | -P 2ybc                        |
| Moiety formula  | C20 H21 Cu Dy N5 O15 | C20 H21 Cu Dy N5 O15           |
| Sum formula     | C20 H21 Cu Dy N5 O15 | C20 H22 Cu Dy N5 O15           |
| Mr              | 797.47               | 798.46                         |
| Dx,g cm-3       | 1.995                | 1.997                          |
| Z               | 4                    | 4                              |
| Mu (mm-1)       | 3.677                | 3.677                          |
| F000            | 1564.0               | 1568.0                         |
| F000'           | 1565.32              |                                |
| h,k,lmax        | 16,12,28             | 16,12,28                       |
| Nref            | 5936                 | 5889                           |
| Tmin,Tmax       | 0.569,0.667          |                                |
| Tmin'           | 0.511                |                                |

Correction method= Not given

Data completeness= 0.992      Theta(max)= 27.222

R(reflections)= 0.0520( 5262)      wR2(reflections)= 0.1342( 5889)

S = 1.178      Npar= 386

---

The following ALERTS were generated. Each ALERT has the format  
**test-name\_ALERT\_alert-type\_alert-level.**  
Click on the hyperlinks for more details of the test.

---

## ● Alert level C

|                   |                                                  |                |              |
|-------------------|--------------------------------------------------|----------------|--------------|
| PLAT041_ALERT_1_C | Calc. and Reported SumFormula                    | Strings Differ | Please Check |
| PLAT043_ALERT_1_C | Calculated and Reported Mol. Weight              | Differ by ..   | 0.99 Check   |
| PLAT057_ALERT_3_C | Correction for Absorption Required               | RT(exp) ...    | 1.17 Do !    |
| PLAT068_ALERT_1_C | Reported F000 Differs from Calcd (or Missing)... |                | Please Check |
| PLAT241_ALERT_2_C | High 'MainMol' Ueq as Compared to Neighbors of   |                | 011 Check    |
| PLAT242_ALERT_2_C | Low 'MainMol' Ueq as Compared to Neighbors of    |                | N4 Check     |
| PLAT329_ALERT_4_C | Carbon Atom Hybridisation Unclear for .....      |                | C8 Check     |
| PLAT342_ALERT_3_C | Low Bond Precision on C-C Bonds .....            |                | 0.01259 Ang. |

## ● Alert level G

FORMU01\_ALERT\_1\_G There is a discrepancy between the atom counts in the  
\_chemical\_formula\_sum and \_chemical\_formula\_moiety. This is  
usually due to the moiety formula being in the wrong format.  
Atom count from \_chemical\_formula\_sum: C20 H22 Cu1 Dy1 N5 O15  
Atom count from \_chemical\_formula\_moiety:C20 H21 Cu1 Dy1 N5 O15

FORMU01\_ALERT\_2\_G There is a discrepancy between the atom counts in the  
\_chemical\_formula\_sum and the formula from the \_atom\_site\* data.  
Atom count from \_chemical\_formula\_sum:C20 H22 Cu1 Dy1 N5 O15  
Atom count from the \_atom\_site data: C20 H21 Cu1 Dy1 N5 O15

CELLZ01\_ALERT\_1\_G Difference between formula and atom\_site contents detected.

CELLZ01\_ALERT\_1\_G WARNING: H atoms missing from atom site list. Is this intentional?  
From the CIF: \_cell\_formula\_units\_Z 4  
From the CIF: \_chemical\_formula\_sum C20 H22 Cu Dy N5 O15  
TEST: Compare cell contents of formula and atom\_site data

| atom | Z*formula | cif sites | diff |
|------|-----------|-----------|------|
| C    | 80.00     | 80.00     | 0.00 |
| H    | 88.00     | 84.00     | 4.00 |
| Cu   | 4.00      | 4.00      | 0.00 |
| Dy   | 4.00      | 4.00      | 0.00 |
| N    | 20.00     | 20.00     | 0.00 |
| O    | 60.00     | 60.00     | 0.00 |

PLAT083\_ALERT\_2\_G SHELXL Second Parameter in WGHT Unusually Large 39.81 Why ?

PLAT199\_ALERT\_1\_G Reported \_cell\_measurement\_temperature ..... (K) 273 Check

PLAT200\_ALERT\_1\_G Reported \_diffrn\_ambient\_temperature ..... (K) 273 Check

PLAT343\_ALERT\_2\_G Unusual sp? Angle Range in Main Residue for C8 Check

PLAT367\_ALERT\_2\_G Long? C(sp?)-C(sp?) Bond C7 - C8 . 1.56 Ang.

PLAT794\_ALERT\_5\_G Tentative Bond Valency for Dy1 (III) . 2.94 Info

- 
- 0 **ALERT level A** = Most likely a serious problem - resolve or explain  
0 **ALERT level B** = A potentially serious problem, consider carefully  
8 **ALERT level C** = Check. Ensure it is not caused by an omission or oversight  
10 **ALERT level G** = General information/check it is not something unexpected

- 8 ALERT type 1 CIF construction/syntax error, inconsistent or missing data  
6 ALERT type 2 Indicator that the structure model may be wrong or deficient  
2 ALERT type 3 Indicator that the structure quality may be low  
1 ALERT type 4 Improvement, methodology, query or suggestion  
1 ALERT type 5 Informative message, check
-

It is advisable to attempt to resolve as many as possible of the alerts in all categories. Often the minor alerts point to easily fixed oversights, errors and omissions in your CIF or refinement strategy, so attention to these fine details can be worthwhile. In order to resolve some of the more serious problems it may be necessary to carry out additional measurements or structure refinements. However, the purpose of your study may justify the reported deviations and the more serious of these should normally be commented upon in the discussion or experimental section of a paper or in the "special\_details" fields of the CIF. checkCIF was carefully designed to identify outliers and unusual parameters, but every test has its limitations and alerts that are not important in a particular case may appear. Conversely, the absence of alerts does not guarantee there are no aspects of the results needing attention. It is up to the individual to critically assess their own results and, if necessary, seek expert advice.

### **Publication of your CIF in IUCr journals**

A basic structural check has been run on your CIF. These basic checks will be run on all CIFs submitted for publication in IUCr journals (*Acta Crystallographica*, *Journal of Applied Crystallography*, *Journal of Synchrotron Radiation*); however, if you intend to submit to *Acta Crystallographica Section C* or *E* or *IUCrData*, you should make sure that full publication checks are run on the final version of your CIF prior to submission.

### **Publication of your CIF in other journals**

Please refer to the *Notes for Authors* of the relevant journal for any special instructions relating to CIF submission.

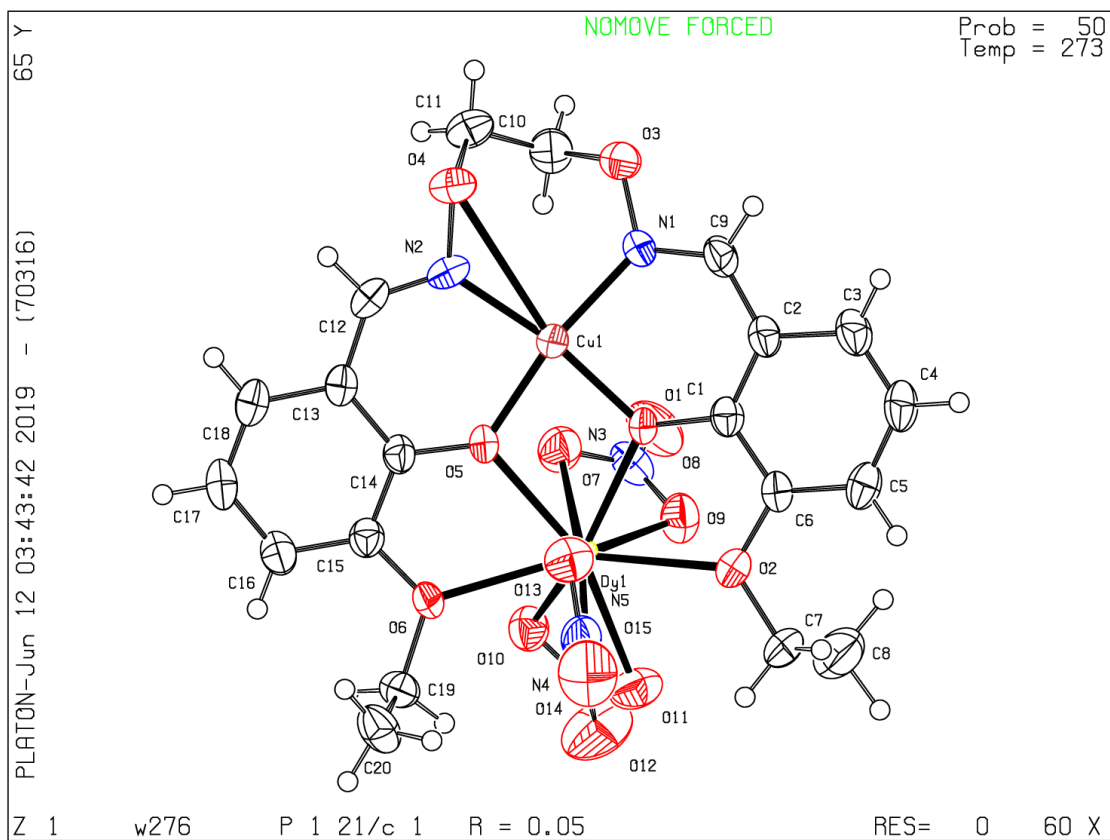

Supplement: Supplementary file 1 [file 23614370]
